# Supplementary material for: Gene Polymorphisms of Hormonal Regulators of Metabolism in Patients with Schizophrenia with Metabolic Syndrome
Source: MDPI journal article supplement (doi:10.3390/genes13050844), 2022-05-08
Supplement: s1 [file s1]

**Table S1.** The concentration of glucose and lipids in the blood serum of the studied patient groups.

| Parameter, mmol/L         | Patients without MetS | Patients with MetS | <i>p</i> value |
|---------------------------|-----------------------|--------------------|----------------|
| Glucose                   | 4,9 [4,3; 5,4]        | 5,3 [4,7; 6,0]     | <0.0001        |
| Total cholesterol         | 4,45 [3,85; 5,00]     | 4,80 [4,10; 5,57]  | 0.001          |
| High-density lipoproteins | 1,08 [0,86; 1,32]     | 0,86 [0,70; 1,06]  | <0.0001        |
| Triglyceride              | 1,14 [0,81; 1,48]     | 2,03 [1,60; 2,50]  | <0.0001        |

Comparisons between groups were performed using Mann–Whitney U-test.

**Table S2.** The basic information of analyzed polymorphic variants.

| Gene          | Polymorphic variant | Chromosome: Location | Region                             | HWE $\chi^2$  | HWE p            |
|---------------|---------------------|----------------------|------------------------------------|---------------|------------------|
| <i>LEPR</i>   | rs1805094           | 1:65610269           | missense variant                   | 0.000         | 1.000            |
|               | rs1137101           | 1:65592830           | missense variant                   | 0.059         | 0.808            |
|               | rs1171276           | 1:65521766           | intron variant                     | 0.556         | 0.456            |
|               | rs1805134           | 1:65601426           | synonymous variant                 | 0.622         | 0.430            |
| <i>LEP</i>    | rs2167270           | 7:128241296          | 5 prime UTR variant                | 0.248         | 0.618            |
|               | rs3828942           | 7:128254252          | intron variant                     | 0.664         | 0.415            |
|               | rs10954173          | 7:128251387          | intron variant                     | 0.062         | 0.803            |
|               | rs4731426           | 7:128242017          | intron variant                     | 1.113         | 0.291            |
| <i>INSIG2</i> | rs10490624          | 2:118104916          | intron variant                     | <b>99.085</b> | <b>&lt;0.001</b> |
|               | rs12623648          | 2:118112002          | regulatory region variant          | 0.000         | 1.000            |
|               | rs17047718          | 2:118079736          | intergenic variant                 | 0.116         | 0.734            |
|               | rs17587100          | 2:118080834          | regulatory region variant          | <b>4.002</b>  | <b>0.045</b>     |
|               | rs9308762           | 2:118106298          | intron variant                     | <b>54.418</b> | <b>&lt;0.001</b> |
|               | rs17047731          | 2:118083157          | intergenic variant                 | 0.000         | 1.000            |
| <i>GHRL</i>   | rs10490816          | 3:10293488           | non coding transcript exon variant | <b>4.577</b>  | <b>0.032</b>     |
|               | rs26312             | 3:10291174           | 5 prime UTR variant                | 0.046         | 0.830            |
|               | rs26802             | 3:10290681           | intron variant                     | 0.074         | 0.786            |
|               | rs27647             | 3:10290784           | 5 prime UTR variant                | 0.468         | 0.494            |
|               | rs35682             | 3:10287098           | non coding transcript exon variant | 0.165         | 0.685            |
|               | rs35683             | 3:10286566           | non coding transcript exon variant | 0.026         | 0.871            |

**Note:** HWE  $\chi^2$  и HWE p – chi-square and p-value statistics to test the frequency distribution according to the Hardy-Weinberg equilibrium.

**Table S3.** Demographic and clinical parameters of the studied patient groups depending on gender.

| Parameter                              | Men                   |                      |                | Women                 |                      |                |
|----------------------------------------|-----------------------|----------------------|----------------|-----------------------|----------------------|----------------|
|                                        | Patients without MetS | Patients with MetS   | <i>p</i> value | Patients without MetS | Patients with MetS   | <i>p</i> value |
| Mean age (M ± SD)                      | 38.51 ± 11.62         | 39.20 ± 11.26        | 0.694          | 40.21 ± 12.01         | 47.54 ± 10.75        | <0.0001        |
| Mean duration of illness (Me [Q1; Q3]) | 13.0 [7.0; 21.0]      | 15.0 [5.0; 22.0]     | 0.947          | 11.0 [5.0; 17.0]      | 19.0 [11.0; 25.0]    | <0.0001        |
| Mean CPZeq, dose (Me [Q1; Q3])         | 482.5 [250.0; 775.0]  | 426.5 [215.7; 643.8] | 0.508          | 339.9 [200.0; 750.0]  | 417.4 [225.0; 765.0] | 0.214          |
| Body mass index (BMI) (M ± SD)         | 23.39 ± 3.36          | 30.65 ± 4.08         | <0.0001        | 25.63 ± 6.06          | 31.32 ± 6.76         | <0.0001        |
